# Supplementary material
Source: MDPI journal article supplement (https://www.mdpi.com/2071-1050/16/9/3590)
Supplement: s1 [file s1]

Table S1. List of references analysed divided per Country, Topic, and Solutions proposed.

|    | References              | Data | Country                             | Topic                                                                                                      | Solution                                 |
|----|-------------------------|------|-------------------------------------|------------------------------------------------------------------------------------------------------------|------------------------------------------|
| 1  | Abbaspour et al. 2009   | 2009 | Iran                                | Hydrology, River management, Soil and water assessment tool, land use change                               | Integrated Water Resources Management    |
| 2  | Aber et al. 1995        | 1995 | North East United States of America | Water holding capacity                                                                                     | Natural Storage                          |
| 4  | Aggarwal et al. 2021    | 2021 | More Countries                      | Climate change in mountain regions                                                                         | Integrated Water Resources Management    |
| 3  | Agrawal 2008            | 2008 | More Countries                      | Water resources, management and political aspects                                                          | Political directions                     |
| 5  | Allan & Pahl-Wostl 2013 | 2013 | China                               | Adaptation strategy for water management                                                                   | Integrated Water Resources Management    |
| 6  | Allan 2003              | 2003 | More Countries                      | The important of political contest (social and geographic)                                                 | Integrated Water Resources Management    |
| 7  | Alsdorf et al. 2007     | 2007 | More Countries                      | Methodology to measure spatial and temporal water distribution                                             | Natural Storage                          |
| 8  | Amanambu et al. 2020    | 2020 | More Countries                      | Groundwater resources and evolution under climate change                                                   | Groundwater management                   |
| 9  | Arnell 1998             | 1998 | United Kingdom                      | Water resources under climate change                                                                       | Integrated Water Resources Management    |
| 10 | Arnell 1999             | 1999 | More Countries                      | Impact of climate change on water resources around the world                                               | Increase knowledge                       |
| 11 | Bai et al. 2019         | 2019 | United States of America            | The effects of land use changes and climate change on ecosystem services                                   | Nature Based Solution                    |
| 12 | Barnett 2003            | 2003 | More Countries                      | Analysis of political economical approach of climate change considering adaptation, vulnerability and risk | Political directions                     |
| 13 | Barnett et al. 2004     | 2004 | United States of America            | Methodology to assess the effects of climate change on water resource in different part of America         | Increased knowledge                      |
| 14 | Benini et al. 2016      | 2016 | Italy                               | Under different climate scenario the effect on land use and water resources availability                   | Political directions and Natural Storage |

|    |                           |      |                          |                                                                                                                                        |                                                                         |
|----|---------------------------|------|--------------------------|----------------------------------------------------------------------------------------------------------------------------------------|-------------------------------------------------------------------------|
| 15 | Berga 2016                | 2016 | More Countries           | Positive effect of hydroelectric power to deal with climate change and for water resource management                                   | Reservoirs                                                              |
| 16 | Bhatt & Arora 2015        | 2015 | More Countries           | Technological solutions to improve tilling of soil and to retain more water                                                            | Natural Storage                                                         |
| 17 | Boelee et al. 2013        | 2013 | Africa                   | Positive and negative aspects and effects of water storage                                                                             | Terrestrial Water Storage                                               |
| 18 | Branca et al. 2013        | 2013 | More Countries           | Land management and management of agricultural production                                                                              | Integrated Water Resources Management                                   |
| 19 | Burton 1997               | 1997 | United States of America | The adaptation to the climate variability                                                                                              | Political directions                                                    |
| 20 | Cai et al. 2015           | 2015 | More Countries           | Management of water in agricultural practices                                                                                          | Political directions, Increased knowledge and Terrestrial Water Storage |
| 21 | Cancelliere 2019          | 2019 | Italy                    | Model to assess the future evolution of reservoirs under climate change scenario                                                       | Reservoirs                                                              |
| 22 | Case et al. 2021          | 2021 | United States of America | Impact analysis of climate change on vegetation and importance of vegetation to deal with climate change and water resource management | Nature Based Solution                                                   |
| 23 | Change 2007               | 2007 | More Countries           | IPCC report                                                                                                                            | Political directions                                                    |
| 24 | Chausson et al. 2020      | 2020 | More Countries           | The efficacy of Nature Based Solution to improve resilience to climate change                                                          | Nature Based Solution                                                   |
| 25 | Collier et al. 2008       | 2008 | Africa                   | The effects of climate change on social and economy aspect and the role of government                                                  | Political directions                                                    |
| 26 | Costello et al. 2009      | 2009 | More Countries           | Effects of climate change on human security and health and the role of government                                                      | Political directions, policy makers                                     |
| 27 | Craig 2005                | 2005 | Australia                | Water and agricultural management under climate change and evaporation                                                                 | Increased knowledge, new technologies                                   |
| 28 | Craig et al. 2007         | 2007 | Australia                | Water resource management link with reservoirs                                                                                         | Increased knowledge, new technologies                                   |
| 29 | Dale 1997                 | 1997 | More Countries           | A review on relationship between land use and climate change                                                                           | Integrated Water Resources Management                                   |
| 30 | De Loe & Kreutzwiser 2000 | 2000 | Canada                   | Adaptation of water resources management under climate change                                                                          | Integrated Water Resources Management                                   |

|    |                           |      |                                  |                                                                                          |                                                                                                                                             |
|----|---------------------------|------|----------------------------------|------------------------------------------------------------------------------------------|---------------------------------------------------------------------------------------------------------------------------------------------|
| 31 | de Souza Dias et al. 2018 | 2018 | Brasile                          | Impact of climate change on reservoirs management and hydropower generation              | Increased knowledge, new technologies                                                                                                       |
| 32 | Deng & Chen 2017          | 2017 | Central Asia                     | Climate change effects on terrestrial water storage using satellites (GRACE)             | Terrestrial Water Storage                                                                                                                   |
| 33 | DeNicola et al. 2015      | 2015 | Saudi Arabia                     | Water resource management under climate change, adaptation and mitigation                | Integrated Water Resources Management                                                                                                       |
| 34 | Dettinger et al. 2015     | 2015 | Western United States of America | The effects of climate change on water resources, environmental and agricultural         | Integrated Water Resources Management                                                                                                       |
| 35 | Döll et al. 2015          | 2015 | More Countries                   | Most relevant risk of climate change on freshwater resources                             | Integrated Water Resources Management                                                                                                       |
| 36 | Dorđević & Dašić 2011     | 2011 | Serbia                           | Water resource management considering reservoirs and their positive aspects              | Reservoirs                                                                                                                                  |
| 37 | Earman & Dettinger 2011   | 2011 | More Countries                   | Effects of climate change on groundwater resources                                       | Groundwater management                                                                                                                      |
| 38 | Eriksson et al. 2009      | 2009 | Himalayan Region                 | Impact of climate change on water resources                                              | Political directions, policy makers, Population participation, Increased knowledge, new technologies                                        |
| 39 | Estrela et al. 2012       | 2012 | Spain                            | Impact of climate change on water resources and hydrological models                      | Integrated Water Resources Management, Political directions, policy makers                                                                  |
| 40 | Feng et al. 2018          | 2018 | China                            | Evaluation of water storage variation using satellite information (GRACE)                | Groundwater management                                                                                                                      |
| 41 | Forootan et al. 2017      | 2017 | Middle East                      | Water resources management                                                               | Natural Storage                                                                                                                             |
| 42 | Frappart & Ramillien 2018 | 2018 | More Countries                   | Water resource management, quantification of groundwater resource usign stellite (GRACE) | Groundwater management                                                                                                                      |
| 43 | Frederick & Major 1997    | 1997 | More Countries                   | Effects of climate change on water resources                                             | Integrated Water Resources Management, Political directions, policy makers, Population participation, Increased knowledge, new technologies |
| 44 | Gandure et al. 2013       | 2013 | South Africa                     | Risk and opportunity of adaptations to climate change for farmers                        | Political directions, policy makers                                                                                                         |
| 45 | Garrote et al. 2015       | 2015 | Mediterranean Europe             | Water resource management under climate change using models estimation                   | Integrated Water Resources Management, Political directions, policy makers,                                                                 |

|    |                         |      |                                  |                                                                                                     |                                                                                                                                              |
|----|-------------------------|------|----------------------------------|-----------------------------------------------------------------------------------------------------|----------------------------------------------------------------------------------------------------------------------------------------------|
| 46 | Gergel et al. 2017      | 2017 | Western United States of America | The impact of climate change on snow, soil moisture, using hydrology model                          | Terrestrial Water Storage                                                                                                                    |
| 47 | Giordano et al. 2007    | 2007 | Southern Italy                   | Decision-making process for water resources management                                              | Integrated Water Resources Management, Political directions, policy makers, Population participation                                         |
| 48 | Goteti et al. 2008      | 2008 | More Countries                   | Satellite for evaluating Terrestrial Water Storage                                                  | Terrestrial Water Storage                                                                                                                    |
| 49 | Grafton et al. 2013     | 2013 | More Countries                   | Climate change requests changes in governance                                                       | Integrated Water Resources Management, Political directions, policy makers                                                                   |
| 50 | Granados et al. 2021    | 2021 | Southern Europe                  | The role of reservoir storage for water availability under climate change                           | Reservoirs                                                                                                                                   |
| 51 | Green et al. 2011       | 2011 | More Countries                   | Examination of connections between climate change and groundwater                                   | Groundwater management                                                                                                                       |
| 52 | He et al. 2017          | 2017 | California                       | Hydrological model to analyse the human impact of water management                                  | Integrated Water Resources Management                                                                                                        |
| 53 | Hess et al. 2008        | 2008 | More Countries                   | Climate change, risk management, human health and environment                                       | Integrated Water Resources Management, Political directions, policy makers                                                                   |
| 54 | Hooper 2003             | 2003 | More Countries                   | Integrated Water Resources Management and River Basin Governance                                    | Integrated Water Resources Management                                                                                                        |
| 55 | Howard et al. 2016      | 2016 | More Countries                   | The impact of climate change on water and sanitation                                                | Integrated Water Resources Management, Political directions, policy makers, Increased knowledge, new technologies                            |
| 56 | Hulme et al. 2001       | 2001 | Africa                           | Future scenarios and consequences on Africa climates                                                | Integrated Water Resources Management, Increased knowledge, new technologies                                                                 |
| 57 | Iglesias & Garrote 2015 | 2015 | Europe                           | Impacts of climate change, adaptation strategies, risks                                             | Integrated Water Resources Management, Political directions, policy makers, Increased knowledge, new technologies, Terrestrial Water Storage |
| 58 | Iglesias et al. 2012    | 2012 | Europe                           | The impact of climate change on agriculture                                                         | Integrated Water Resources Management, Political directions, policy makers                                                                   |
| 59 | Immerzeel et al. 2010   | 2010 | Central Asia                     | Effects of climate change on precipitation, glacial smelting, rivers, agriculture and food security | Integrated Water Resources Management, Political directions, policy makers                                                                   |
| 60 | Jackson et al. 2001     | 2001 | United States of America         | Impact of climate change on freshwater and ecosystem services                                       | Integrated Water Resources Management, Political directions, policy makers, Increased knowledge, new technologies                            |

|    |                           |      |                                        |                                                                                           |                                                                              |
|----|---------------------------|------|----------------------------------------|-------------------------------------------------------------------------------------------|------------------------------------------------------------------------------|
| 61 | Jin & Zhang 2016          | 2016 | South-Western United States of America | Evaluation of water content by GPS and hydrological model                                 | Terrestrial Water Storage                                                    |
| 62 | Keskinen et al. 2010      | 2010 | South-East Asia                        | Adaptation strategies to deal with climate change and its effect of water resources       | Integrated Water Resources Management, Political directions, policy makers   |
| 63 | Koutroulis et al. 2013    | 2013 | Greece                                 | Effects of climate change on water resources                                              | Integrated Water Resources Management                                        |
| 64 | Kundzewicz & Matczak 2012 | 2012 | Polland                                | Review of the impacts of climate change in Polland                                        | Political directions, policy makers                                          |
| 65 | Kusangaya et al. 2014     | 2014 | South Africa                           | Impact of climate change on water resources                                               | Integrated Water Resources Management, Increased knowledge, new technologies |
| 66 | Lehner et al. 2006        | 2006 | Europe                                 | Impact of climate change on extreme events                                                | Integrated Water Resources Management                                        |
| 67 | Lempert & Groves 2010     | 2010 | Western United States of America       | Adaptative strategies to deal with climate change                                         | Integrated Water Resources Management                                        |
| 68 | Li & Huang 2009           | 2009 | No Country                             | The uncertainty in water management and water quality                                     | Integrated Water Resources Management                                        |
| 69 | Liu et al. 2020           | 2020 | More Countries                         | Satellite for evaluating Terrestrial Water Storage                                        | Terrestrial Water Storage                                                    |
| 70 | Loáiciga 2003             | 2003 | North America                          | The impact of climate change on groundwater resources                                     | Groundwater management                                                       |
| 71 | Lopez et al. 2009         | 2009 | England                                | Different scenarios to decrease uncertainty of forecast and model for adaptation measures | Integrated Water Resources Management, Reservoirs                            |
| 72 | Mall et al. 2006          | 2006 | India                                  | The effect of climate change on water resources                                           | Integrated Water Resources Management, Political directions, policy makers   |
| 73 | Manga et al. 2021         | 2021 | More Countries                         | Water storage in developing countries                                                     | Increased knowledge, new technologies, Terrestrial Water Storage             |
| 74 | Marunga et al. 2006       | 2006 | Zimbabwe                               | A new approach to management water resources                                              | Integrated Water Resources Management, Increased knowledge, new technologies |
| 75 | McBean & Motiee 2008      | 2008 | North America                          | The effect of climate change on water resources                                           | Increased knowledge, new technologies                                        |
| 76 | McCartney & Smakhtin 2010 | 2010 | More Countries                         | Different water storage systems to deal with climate change                               | Terrestrial Water Storage                                                    |

|    |                          |      |                          |                                                                        |                                                                                                                   |
|----|--------------------------|------|--------------------------|------------------------------------------------------------------------|-------------------------------------------------------------------------------------------------------------------|
| 77 | Milly et al. 2008        | 2008 | No Country               | Variability of climate change                                          | Integrated Water Resources Management, Reservoirs                                                                 |
| 78 | Misra 2014               | 2014 | More Countries           | Water and food security under climate change                           | Groundwater management                                                                                            |
| 79 | Mortsch & Quinn 1996     | 1996 | North America            | Impact of climate change on aquatic ecosystems                         | Increased knowledge, new technologies, Natural Storage                                                            |
| 80 | Mostert 2003             | 2003 | Europe                   | Water Framework Directive and water management research                | Integrated Water Resources Management, Political directions, policy makers                                        |
| 81 | Murdoch et al. 2000      | 2000 | North America            | Effects of climate change on water quality                             | Integrated Water Resources Management, Political directions, policy makers, Increased knowledge, new technologies |
| 82 | Nazemi & Wheeler 2015    | 2015 | More Countries           | Water demand in large-scale models                                     | Integrated Water Resources Management, Increased knowledge, new technologies                                      |
| 83 | Nicklow et al. 2010      | 2010 | No Country               | A review of water resources planning and management                    | Integrated Water Resources Management, Political directions, policy makers, Increased knowledge, new technologies |
| 84 | Nikolaou et al. 2020     | 2020 | Europe                   | A review of sustainable irrigation under impact of climate change      | Increased knowledge, new technologies                                                                             |
| 85 | Olmstead 2014            | 2014 | United States of America | A review of impact of climate change on water resources management     | Integrated Water Resources Management, Political directions, policy makers, Reservoirs/Infrastructures            |
| 86 | Pahl-Wostl 2007          | 2007 | Europe                   | Scientific method for a new adaptive water management                  | Integrated Water Resources Management                                                                             |
| 87 | Palanisami et al. 2010   | 2010 | India                    | Water resources management for irrigation with different water storage | Terrestrial Water Storage, Political directions, policy makers                                                    |
| 88 | Palmer et al. 2008       | 2008 | More Countries           | Water resources management to minimize risks to ecosystems and people  | Nature Based Solution                                                                                             |
| 89 | Panwar & Chakrapani 2013 | 2013 | India                    | Effects of climate change on groundwater resources                     | Groundwater management                                                                                            |
| 90 | Payne et al. 2004        | 2004 | Columbia                 | The effects of climate change on the hydrology and water resources     | Reservoirs                                                                                                        |
| 91 | Pearson et al. 2010      | 2010 | No Country               | Support decision system that involves citizens                         | Integrated Water Resources Management, Political directions, policy makers, Population participation              |

|     |                             |      |                                  |                                                                                                |                                                                              |
|-----|-----------------------------|------|----------------------------------|------------------------------------------------------------------------------------------------|------------------------------------------------------------------------------|
| 92  | Pereira et al. 2002         | 2002 | More Countries                   | Water use in agriculture, recycling and desalination                                           | Integrated Water Resources Management, Increased knowledge, new technologies |
| 93  | Perry & Praskievicz 2017    | 2017 | Western United States of America | Water storage and adaptation measure under climate change                                      | Integrated Water Resources Management, Reservoirs                            |
| 94  | Piao et al. 2010            | 2010 | China                            | The impacts of climate change on water resources and agriculture                               | Increased knowledge, new technologies, Terrestrial Water Storage             |
| 95  | Pires et al. 2017           | 2017 | No Country                       | Indicators related to water use management and sustainability                                  | Integrated Water Resources Management                                        |
| 96  | Pokhrel et al. 2021         | 2021 | More Countries                   | Water availability, water management and adaptation under climate change                       | Terrestrial Water Storage                                                    |
| 97  | Polenghi-Gross et al. 2014  | 2014 | California                       | Water resources management for drinking water                                                  | Reservoirs                                                                   |
| 98  | Pollard et al. 2004         | 2004 | More Countries                   | Risk analysis and risk management tools and techniques into the water sector                   | Political directions, policy makers                                          |
| 99  | Price 1998                  | 1998 | United Kingdom                   | The role of groundwater under climate change                                                   | Groundwater management                                                       |
| 100 | Qiao et al. 2019            | 2019 | Tibet                            | The effects of climate change on lake water storage, hydrological cycle, glacial meltwater     | Terrestrial Water Storage                                                    |
| 101 | Qu et al. 2013              | 2013 | No Country                       | Waste water treatment                                                                          | Integrated Water Resources Management, Increased knowledge, new technologies |
| 102 | Rangecroft et al. 2013      | 2013 | Bolivia                          | Climate change and water resources in arid mountains                                           | Integrated Water Resources Management                                        |
| 103 | Ravindranath & Sathaye 2002 | 2002 | More Countries                   | Climate change in the developing countries                                                     | Integrated Water Resources Management                                        |
| 104 | Rehan et al. 2011           | 2011 | Canada                           | Improve water resources management by improving aqueduct networks, reuse and treatment systems | Increased knowledge, new technologies                                        |
| 105 | Rohde et al. 2020           | 2020 | More Countries                   | Multibenefit solutions for securing water for food, drinking and the environment               | Integrated Water Resources Management, Increased knowledge, new technologies |
| 106 | Rounsevell & Reay 2009      | 2009 | United Kingdom                   | Relationships between land use and climate change                                              | Political directions, policy makers, Nature Based Solution                   |
| 107 | Santer et al. 1996          | 1996 | More Countries                   | IPCC report                                                                                    | Political directions, policy makers                                          |

|     |                            |      |                  |                                                                                     |                                                                                                      |
|-----|----------------------------|------|------------------|-------------------------------------------------------------------------------------|------------------------------------------------------------------------------------------------------|
| 108 | Schilling et al 2020       | 2020 | North Africa     | Climate change vulnerability and its social implications                            | Increased knowledge, new technologies, Political directions, policy makers                           |
| 109 | Sechi & Sulis 2009         | 2009 | Sardinia         | Optimization and simulation models to define drought mitigation measures            | Reservoirs                                                                                           |
| 110 | Şen 2021                   | 2021 | More Countries   | Water resources management increasing water storage with reservoirs and groundwater | Reservoirs, Natural Storage, Groundwater management                                                  |
| 111 | Seung-Hwan et al. 2013     | 2013 | Korea            | Impacts of climate and land use change on agriculture and water storage             | Reservoirs, Terrestrial Water Storage                                                                |
| 112 | Shamsudduha & Panda 2019   | 2019 | Himalayan Region | A review of spatio-temporal changes in terrestrial water storage                    | Groundwater management, Terrestrial Water Storage                                                    |
| 113 | Shiru et al. 2020          | 2020 | Nigeria          | The effects of climate change on water resources availability and ecosystems        | Integrated Water Resources Management, Groundwater management                                        |
| 114 | Siegfried et al. 2012      | 2012 | Central Asia     | Effects of climate change on water resources                                        | Political directions, policy makers, Reservoirs/Infrastructures                                      |
| 115 | Skrzypczak et al. 2020     | 2020 | No Country       | Water storage improvement with biodegradable hydrogel materials                     | Reservoirs, Terrestrial Water Storage                                                                |
| 116 | Staudinger et al. 2017     | 2017 | Switzerland      | Different types of storage including dynamic and mobile catchment storage           | Terrestrial Water Storage                                                                            |
| 117 | Swain et al. 2022          | 2022 | India            | A review of climate change impact on groundwater hydrology                          | Groundwater management                                                                               |
| 118 | Taylor et al. 2013         | 2013 | More Countries   | Effects of climate change on groundwater resources                                  | Groundwater management                                                                               |
| 119 | Thornton et al., 2014      | 2014 | More Countries   | A review on variability and vulnerability to climate change                         | Increased knowledge, new technologies, Political directions, policy makers                           |
| 120 | Tong & Chen 2002           | 2002 | Miami            | Land use management to improve water resource quality                               | Integrated Water Resources Management, Political directions, policy makers                           |
| 121 | Urry 2015                  | 2015 | More Countries   | The effects of climate change on society                                            | Political directions, policy makers                                                                  |
| 122 | Vairavamoorthy et al. 2008 | 2008 | South India      | Effects of climate change on urban areas                                            | Increased knowledge, new technologies, Political directions, policy makers                           |
| 123 | Vermeulen et al. 2012      | 2012 | More Countries   | Options for supporting agriculture and food security under climate change           | Political directions, policy makers, Population participation, Increased knowledge, new technologies |
| 124 | Wada et al. 2017           | 2017 | More Countries   | Recent changes in land water contribution to sea level variations                   | Terrestrial Water Storage                                                                            |



|     |                     |      |                  |                                                                             |                                                                            |
|-----|---------------------|------|------------------|-----------------------------------------------------------------------------|----------------------------------------------------------------------------|
| 125 | Wang et al. 2018    | 2018 | China            | Water resource management in a urban contest - The sponge City              | Integrated Water Resources Management, Nature Based Solution               |
| 126 | Watts et al. 2015   | 2015 | United Kingdom   | Past changes and future prospects of climate change and water               | Increased knowledge, new technologies, Political directions, policy makers |
| 127 | Weng et al. 2010    | 2010 | China            | Decision support system for water resources management and planning         | Integrated Water Resources Management                                      |
| 128 | Woolway et al. 2020 | 2020 | More Countries   | Impact of climate change on lacustrine ecosystem                            | Increased knowledge, new technologies                                      |
| 129 | Wright et al. 2004  | 2004 | More Countries   | Different options to deal with water scarcity in developing countries       | Increased knowledge, new technologies                                      |
| 130 | Xu et al. 2009      | 2009 | Himalayan Region | Effects of climate change on water, biodiversity, and livelihoods           | Political directions, policy makers, Population participation              |
| 131 | Yang et al. 2015    | 2015 | More Countries   | Climate change and water storage variability in arid regions                | Terrestrial Water Storage                                                  |
| 132 | Zhang et al. 2018   | 2018 | More Countries   | Water resources management and positive aspects of use of renewable sources | Reservoirs                                                                 |
| 133 | Zhang et al. 2019   | 2019 | Australia        | Impacts of future climate change on water resource availability             | Integrated Water Resources Management                                      |
| 134 | Zhang et al. 2020   | 2020 | Tibetan Plateau  | Impact of climate change on lacustrine ecosystem                            | Increased knowledge, new technologies                                      |
